# Supplementary material for: Profiling the interplay and coevolution of Microcystis aeruginosa and cyanosiphophage Mic1
Source: PubMed Central journal article supplement (PMC11237433; doi:10.1128/spectrum.00298-24), 2024-05-02
Supplement: reviewer-comments.pdf [file reviewer-comments.pdf]

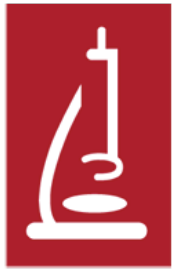

AMERICAN  
SOCIETY FOR  
MICROBIOLOGY

# Microbiology Spectrum

## Profiling the interplay and coevolution of *Microcystis aeruginosa* and cyanosiphophage Mic1

Xiao-Qian Wang, Kang Du, Chaoyi Chen, Pu Hou, Wei-Fang Li, Yuxing Chen, Qiong Li, and Cong-Zhao Zhou

Corresponding Author(s): Cong-Zhao Zhou, University of Science and Technology of China

---

### Review Timeline:

|                     |                   |
|---------------------|-------------------|
| Submission Date:    | January 31, 2024  |
| Editorial Decision: | February 28, 2024 |
| Revision Received:  | March 27, 2024    |
| Accepted:           | April 5, 2024     |

---

Editor: Blaire Steven

Reviewer(s): Disclosure of reviewer identity is with reference to reviewer comments included in decision letter(s). The following individuals involved in review of your submission have agreed to reveal their identity: Konstantin V. Severinov (Reviewer #1)

### Transaction Report:

(Note: With the exception of the correction of typographical or spelling errors that could be a source of ambiguity, letters and reports are not edited. The original formatting of letters and referee reports may not be reflected in this compilation.)

DOI: <https://doi.org/10.1128/spectrum.00298-24>

Re: Spectrum00298-24 (Profiling the interplay and coevolution of *Microcystis aeruginosa* and cyanosiphophage Mic1)

Dear Prof. Cong-Zhao Zhou:

Thank you for the privilege of reviewing your work. Below you will find my comments, instructions from the Spectrum editorial office, and the reviewer comments.

This manuscript was reviewed and seen and worthy of publication after a few minor modifications. Overall, I found the manuscript well written and presented, although I did find some minor errors in English and grammar such as the following:  
Line 43: I would remove "in the long history"

Line 47 replace has ever been with "is"

Line 79 replace been burst with "developed"

If possible I would suggest the authors have someone proficient in English to check through, but again I would note the errors are small and do not take away from understanding the science of the manuscript.

Please return the manuscript within 60 days; if you cannot complete the modification within this time period, please contact me. If you do not wish to modify the manuscript and prefer to submit it to another journal, notify me immediately so that the manuscript may be formally withdrawn from consideration by Spectrum.

#### Revision Guidelines

To submit your modified manuscript, log into the submission site at <https://spectrum.msubmit.net/cgi-bin/main.plex>. Go to Author Tasks and click the appropriate manuscript title to begin. The information you entered when you first submitted the paper will be displayed; update this as necessary. Note the following requirements:

- Upload point-by-point responses to the issues raised by the reviewers in a file named "Response to Reviewers," NOT IN YOUR COVER LETTER
- Upload a compare copy of the manuscript (without figures) as a "Marked-Up Manuscript" file
- Upload a clean .DOC/.DOCX version of the revised manuscript and remove the previous version
- Each figure must be uploaded as a separate, editable, high-resolution file (TIFF or EPS preferred), and any multipanel figures must be assembled into one file
- Any [supplemental material](#) intended for posting by ASM should be uploaded separate from the main manuscript; you can combine all supplemental material into one file (preferred) or split it into a maximum of 10 files, with all associated legends included

For complete guidelines on revision requirements, see our [Submission and Review Process](#) webpage. Submission of a paper that does not conform to guidelines may delay acceptance of your manuscript.

**Data availability:** ASM policy requires that data be available to the public upon online posting of the article, so please verify all links to sequence records, if present, and make sure that each number retrieves the full record of the data. If a new accession number is not linked or a link is broken, provide Spectrum production staff with the correct URL for the record. If the accession numbers for new data are not publicly accessible before the expected online posting of the article, publication may be delayed; please contact production staff ([Spectrum@asmusa.org](mailto:Spectrum@asmusa.org)) immediately with the expected release date.

**Publication Fees:** For information on publication fees and which article types are subject to charges, visit our [website](#). If your manuscript is accepted for publication and any fees apply, you will be contacted separately about payment during the production process; please follow the instructions in that e-mail. Arrangements for payment must be made before your article is published.

**ASM Membership:** Corresponding authors may [join or renew ASM membership](#) to obtain discounts on publication fees. Need to upgrade your membership level? Please contact Customer Service at [Service@asmusa.org](mailto:Service@asmusa.org).

The ASM Journals program strives for constant improvement in our submission and publication process. Please tell us how we can improve your experience by taking this quick [Author Survey](#).

Thank you for submitting your paper to Spectrum.

Sincerely,

Reviewer #1 (Comments for the Author):

Freshwater cyanobacteria can cause devastating blooms and their interaction with phages is of considerable scientific and practical interest. In the manuscript, Wang et al. investigated the transcriptome of the cyanobacterium *Microcystis aeruginosa* infected with a previously isolated and sequenced siphovirus Mic1. Based on time-course changes in transcript abundances, phage genes were divided into three classes (early, middle and late) with two subclusters within each group. The authors assigned plausible putative functions for many genes from each temporal classes. They also monitored changes in abundance of host transcripts at different stages of viral infection. A Mic1 phage resistant *M. aeruginosa* strain, as well as an alleviated phage were isolated and mutations responsible were identified.

Below a several comments/questions for the authors.

1. The two separate axes as well as separate scales for the host cell number and PFU/ml in Fig. 1a are confusing. Since the logarithmic scale is used, both could be depicted on the same scale.
2. Did the authors analyze the structure of viral DNA within the virions, specifically, were the termini of viral DNA determined? In Fig. S2 the genome map starts with the *tnpB* gene. Does it imply that this gene is truly located at the terminus? Given that *tnpB* is an early gene, does this imply that this end is injected first?
3. It is intriguing that Mic1 genome contains quite large apparently non-coding regions. For instance, in the published annotation ~3 kbps region downstream *tnpB* (gene 49) lacks any annotated features. Given that most phage genomes demonstrate very high coding density, it is quite puzzling. Do the authors have any clues on the functional role of this region? Is this region transcriptionally active?
4. It is stated that it Fig. 3A contains a volcano plot. Usually, a volcano plot shows two values: significance and fold change. In Fig. 3A, only log<sub>2</sub> fold change axis is shown without the significance. Either the plot should be corrected or the text modified.
5. Replace gene numbers with the names of cas genes (e. g. *csm6* instead 1109) in Fig. 3b.
6. In the Materials and Methods section it is stated that differentially expressed host genes were identified using DESeq2 package. Results of the analysis, including adjusted p-values, should be provided. Currently, only log<sub>2</sub>FC values (e. g., Table S3) are shown.
7. Line 262 states "we also isolated a strain of Mic1 that possesses a much lower titer (decreased from 10<sup>9</sup> to 10<sup>6</sup> pfu/mL) towards the *Microcystis* host". This is a rather cryptic statement and should be reworded to make the meaning clearer.
8. It is very intriguing that Mic1 *TnpB* is apparently important for infection. Does the region of *tnpB* where insertion of *cas9/csn1* gene was found contain sequences with microhomology to the *cas9/csn1* locus?
9. Which method was used to prepare cDNA libraries?

Dear Editor,

Thank you very much for handling our manuscript. We appreciated very much the constructive comments and suggestions of you and the reviewer, which help us to improve the quality of our manuscript. We have addressed all questions and suggestions point by point.

### **Editor's comments**

This manuscript was reviewed and seen and worthy of publication after a few minor modifications. Overall, I found the manuscript well written and presented, although I did find some minor errors in English and grammar such as the following:

Line 43: I would remove "in the long history"

Line 47 replace has ever been with "is"

Line 79 replace been burst with "developed"

If possible, I would suggest the authors have someone proficient in English to check through, but again I would note the errors are small and do not take away from understanding the science of the manuscript.

A: All above points have been revised. According to your suggestion, we have carefully proofread the manuscript and corrected mistakes throughout the text.

## Reviewer #1

Freshwater cyanobacteria can cause devastating blooms and their interaction with phages is of considerable scientific and practical interest. In the manuscript, Wang et al. investigated the transcriptome of the cyanobacterium *Microcystis aeruginosa* infected with a previously isolated and sequenced siphovirus Mic1. Based on time-course changes in transcript abundances, phage genes were divided into three classes (early, middle and late) with two subclusters within each group. The authors assigned plausible putative functions for many genes from each temporal classes. They also monitored changes in abundance of host transcripts at different stages of viral infection. A Mic1 phage resistant *M. aeruginosa* strain, as well as an alleviated phage were isolated and mutations responsible were identified.

Below a several comments/questions for the authors.

Q1. The two separate axes as well as separate scales for the host cell number and PFU/ml in Fig. 1A are confusing. Since the logarithmic scale is used, both could be depicted on the same scale.

A: Fig. 1A was revised according to your suggestion.

Q2. Did the authors analyze the structure of viral DNA within the virions, specifically, were the termini of viral DNA determined? In Fig. S2 the genome map starts with the *tnpB* gene. Does it imply that this gene is truly located at the terminus? Given that *tnpB* is an early gene, does this imply that this end is injected first?

A: Although the capsid structure of Mic1 has been solved in 2019 (Jin et al., *Structure*, 2019, DOI: 10.1016/j.str.2019.07.003), the termini of genomic DNA have not yet determined. Supplementary to Fig. 2, the genes in Fig. S2 are sequentially aligned according to the temporal expression patterns identified by RNA-seq. We don't know if *tnpB* is located at the terminus of the viral genomic DNA.

Q3. It is intriguing that Mic1 genome contains quite large apparently non-coding regions. For instance, in the published annotation ~3 kbps region downstream *tnpB* (gene 49) lacks any annotated features. Given that most phage genomes demonstrate very high coding density, it is quite puzzling. Do the authors have any clues on the functional role of this region? Is this region transcriptionally active?

A: Indeed, there is ~3 kbps so-called non-coding region at the downstream of *gp49/tnpB*, which has not been detected in our RNA-seq data. However, we proposed that this region might be transcribed into small RNAs, which are absent in our present sequencing library.

Q4. It is stated that Fig. 3A contains a volcano plot. Usually, a volcano plot shows two values: significance and fold change. In Fig. 3A, only  $\log_2$  fold change axis is shown without the significance. Either the plot should be corrected or the text modified.

A: Thanks for your suggestion. Fig. 3A is not a traditional volcano plot, but an overall display of all differentially expressed genes of the host at different time points. We have revised the legend of Fig. 3A, and added the volcano plot of host differentially

expressed genes at each time point as Fig. S3.

Q5. Replace gene numbers with the names of cas genes (e. g. csm6 instead 1109) in Fig. 3b.

A: Revised.

Q6. In the Materials and Methods section, it is stated that differentially expressed host genes were identified using DESeq2 package. Results of the analysis, including adjusted p-values, should be provided. Currently, only log<sub>2</sub>FC values (e. g., Table S3) are shown.

A: Added as the Table S7, of which the log<sub>2</sub>FC values, *p*-values and adjusted *p*-values of all differentially expressed host genes were provided.

Q7. Line 262 states "we also isolated a strain of Mic1 that possesses a much lower titer (decreased from 10<sup>9</sup> to 10<sup>6</sup> pfu/mL) towards the *Microcystis* host". This is a rather cryptic statement and should be reworded to make the meaning clearer.

A: Sorry for the unclear description. We have revised this sentence.

Q8. It is very intriguing that Mic1 TnpB is apparently important for infection. Does the region of tnpB where insertion of cas9/csn1 gene was found contain sequences with microhomology to the cas9/csn1 locus?

A: Sorry for the mistake. According HHpred, the ORF2067 of *Microcystis aeruginosa*

FACHB 1339 was previously mis-annotated as a type II CRISPR endonuclease Cas9/Csn1. During revision, via structure prediction and comparison, we found that it shares a similar structure to the nickase IsrB (Fig. S6), with an RMSD of 2.3 Å over 315 Cα atoms. Previous studies revealed that IsrB, a member of the IS200/IS605 superfamily of transposons, is usually responsible for nicking the non-target strand of dsDNA containing a 5'-NTGA-3' target-adjacent motif (Altae-Tran et al., *Science*, 2021, DOI: 10.1126/science.abj6856). Indeed, *orf2067* is inserted at the motif 5'-ATGA-3', corresponding to 263 to 266 of original *tnpB*.

Q9. Which method was used to prepare cDNA libraries?

A: Added in the “Materials and Methods” section.



Re: Spectrum00298-24R1 (Profiling the interplay and coevolution of *Microcystis aeruginosa* and cyanosiphophage Mic1)

Dear Prof. Cong-Zhao Zhou:

Thank you for your revisions.

Your manuscript has been accepted, and I am forwarding it to the ASM production staff for publication. Your paper will first be checked to make sure all elements meet the technical requirements. ASM staff will contact you if anything needs to be revised before copyediting and production can begin. Otherwise, you will be notified when your proofs are ready to be viewed.

**Data Availability:** ASM policy requires that data be available to the public upon online posting of the article, so please verify all links to sequence records, if present, and make sure that each number retrieves the full record of the data. If a new accession number is not linked or a link is broken, provide production staff with the correct URL for the record. If the accession numbers for new data are not publicly accessible before the expected online posting of the article, publication may be delayed; please contact ASM production staff immediately with the expected release date.

**Publication Fees:** For information on publication fees and which article types have charges, please visit our [website](#). We have partnered with Copyright Clearance Center (CCC) to collect author charges. If fees apply to your paper, you will receive a message from no-reply@copyright.com with further instructions. For questions related to paying charges through RightsLink, please contact CCC at ASM\_Support@copyright.com or toll free at +1-877-622-5543. CCC makes every attempt to respond to all emails within 24 hours.

**ASM Membership:** Corresponding authors may [join or renew ASM membership](#) to obtain discounts on publication fees. Need to upgrade your membership level? Please contact Customer Service at Service@asmusa.org.

**PubMed Central:** ASM deposits all Spectrum articles in PubMed Central and international PubMed Central-like repositories immediately after publication. Thus, your article is automatically in compliance with the NIH access mandate. If your work was supported by a funding agency that has public access requirements like those of the NIH (e.g., the Wellcome Trust), you may post your article in a similar public access site, but we ask that you specify that the release date be no earlier than the date of publication on the Spectrum website.

**Embargo Policy:** A press release may be issued as soon as the manuscript is posted on the [Spectrum Latest Articles webpage](#). The corresponding author will receive an email with the subject line "ASM Journals Author Services Notification" when the article is available online.

The ASM Journals program strives for constant improvement in our submission and publication process. Please tell us how we can improve your experience by taking this quick [Author Survey](#).

Thank you for submitting your paper to Spectrum.

Sincerely,  
Blair Steven  
Editor  
Microbiology Spectrum
