# Supplementary material for: Profiling the interplay and coevolution of Microcystis aeruginosa and cyanosiphophage Mic1
Source: PubMed Central journal article supplement (PMC11237433; doi:10.1128/spectrum.00298-24), 2024-05-02
Supplement: spectrum.00298-24-s0001.pdf [file spectrum.00298-24-s0001.pdf]

1 **Supplementary information**

2 **Supplementary figures and figure legends**

3

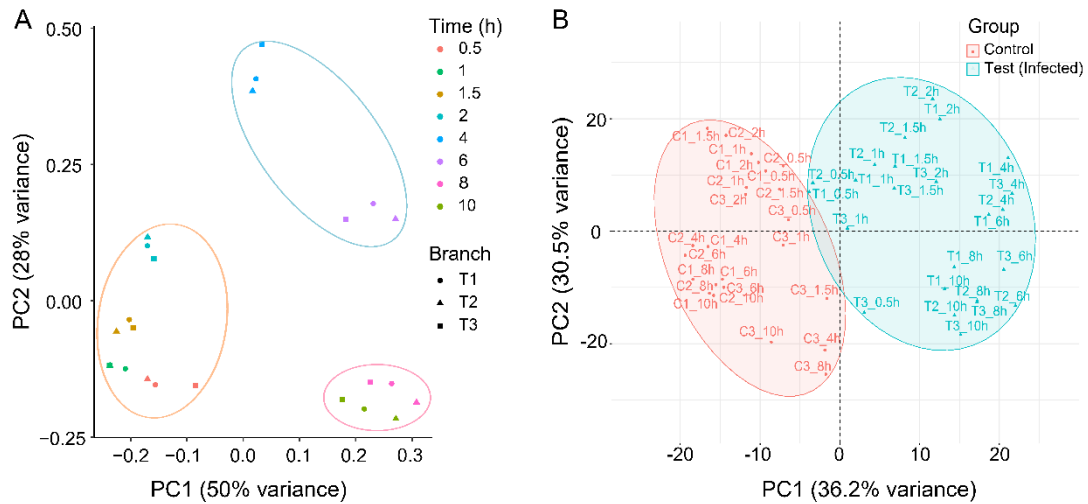

4

5 **FIG S1** Principal component analysis (PCA) for clustering gene expression data, via

6 Hotelling's 95% confidence ellipses. (A) *Mic1* samples could be classified into three

7 groups corresponding to the early, middle and late phase in the lytic cycle. Colors

8 represent different infection time points, whereas shapes indicate three individual

9 infection experiments. (B) PCA on the top 500 genes of host *Microcystis* from control

10 (red) and infected (blue) cells, which shows a distinct clustering. Control: control cells;

11 Test: infected cells.

12

13

14

15

16

17

18

19

20

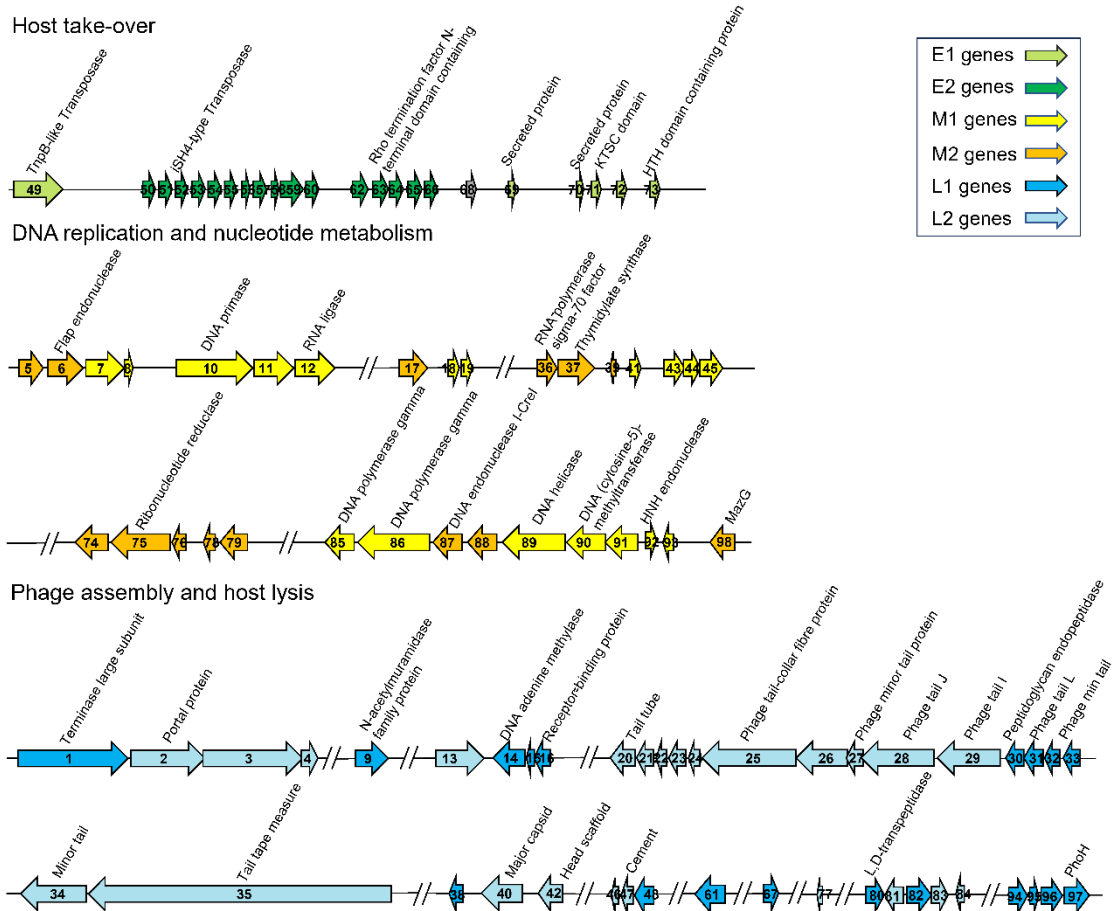

21  
22 **FIG S2** Presentation of 98 Mic1 genes according to the temporal expression patterns.

23 The arrows indicate the transcription direction. The annotations of genes that contribute  
24 to the definite function of each temporal expression pattern are indicated.

25  
26  
27  
28  
29  
30  
31  
32  
33  
34

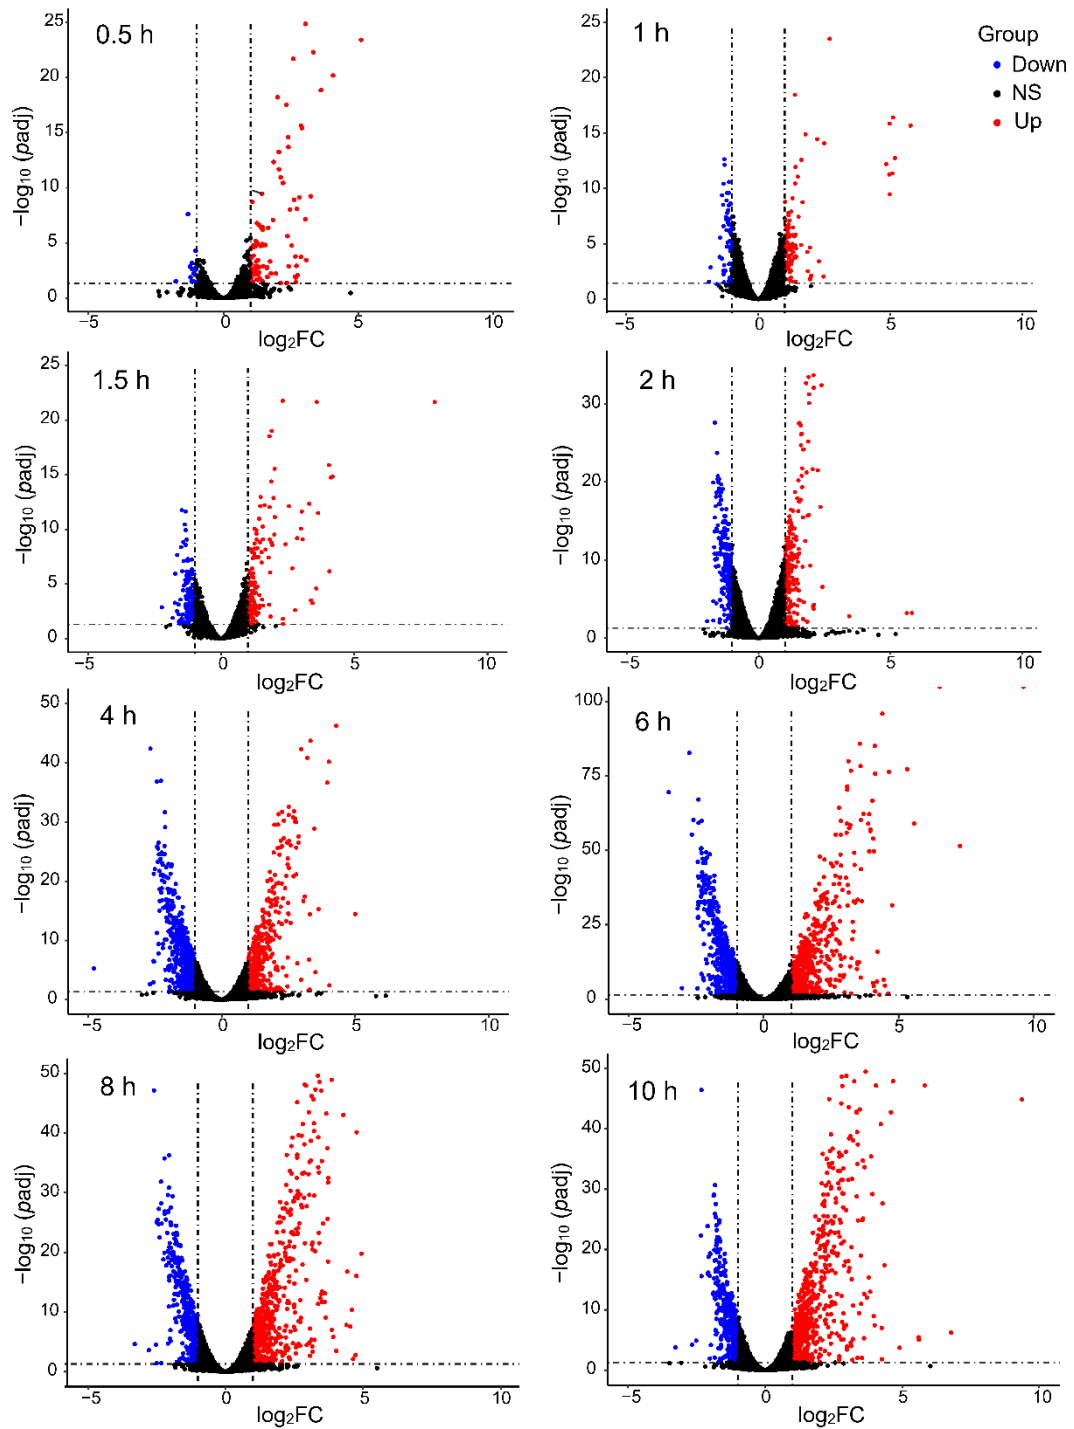

35

36 **FIG S3** Volcano plots of the host DEGs at each time point. The  $\log_2$  scale shows the  
 37 fold change of genes, whereas the  $\log_{10}$  scale represents the significance. Down:  
 38 downregulated host genes; NS: not significant changed genes; Up: upregulated host  
 39 genes.

40

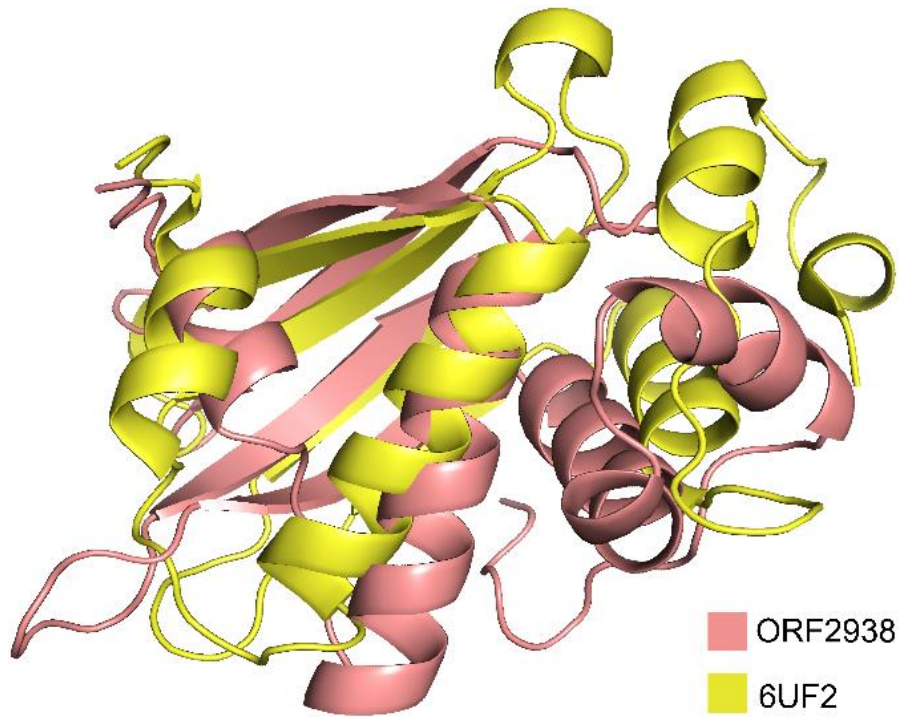

41 **FIG S4** Structural superposition of *Microcystis* ORF2938 (salmon, predicted by  
42 Alphafold2) against the biofilm-related protein Se0862 from *Synechococcus elongatus*  
43 PCC 7942 (yellow, PDB: 6UF2).  
44

45

46

47

48

49

50

51

52

53

54

55

56

57

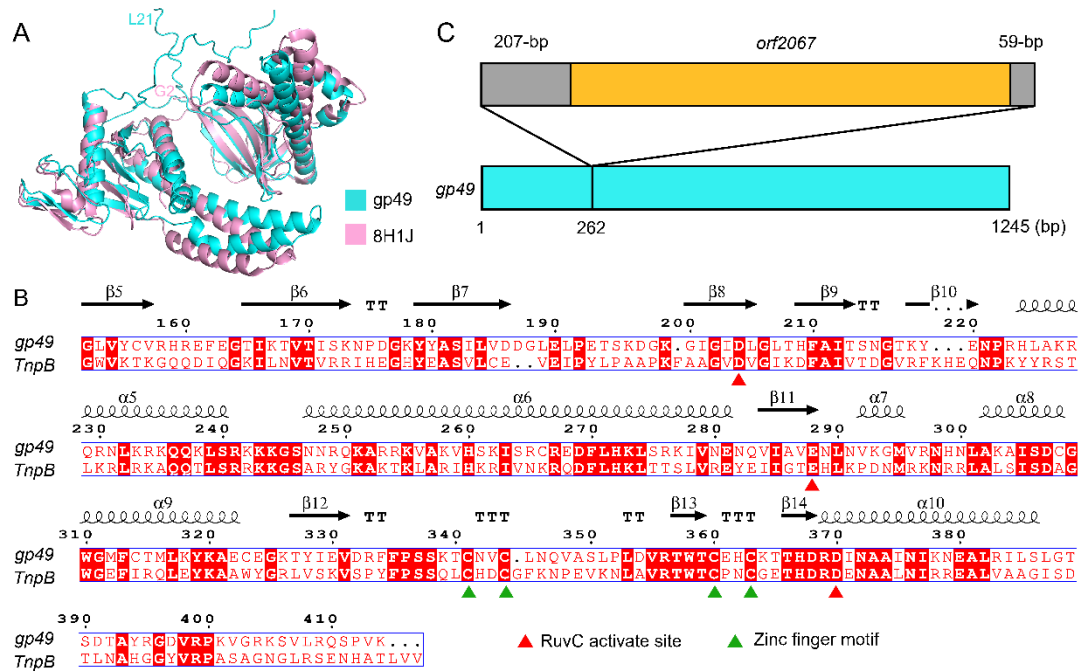

58 **FIG S5** Analyses of Mic1 E1 gene *gp49*. (A) Structural superposition of the Mic1 *gp49*  
 59 (cyan, predicted by AlphaFold2) against the RNA-guided DNA endonuclease TnpB  
 60 from *Deinococcus radiodurans* R1 (pink, PDB: 8H1J). (B) Primary sequence alignment  
 61 of the *gp49* against TnpB. The key residues of zinc finger motif and RuvC activate site  
 62 are indicated with green and red triangles, respectively. (C) A diagram of Mic1 *gp49*  
 63 inserted with the host gene *orf2067*. Cyan: Mic1 *gp49*; yellow: *Microcystis orf2067*;  
 64 gray: the upstream and downstream region of *orf2067*.  
 65  
 66  
 67  
 68  
 69  
 70  
 71  
 72  
 73  
 74

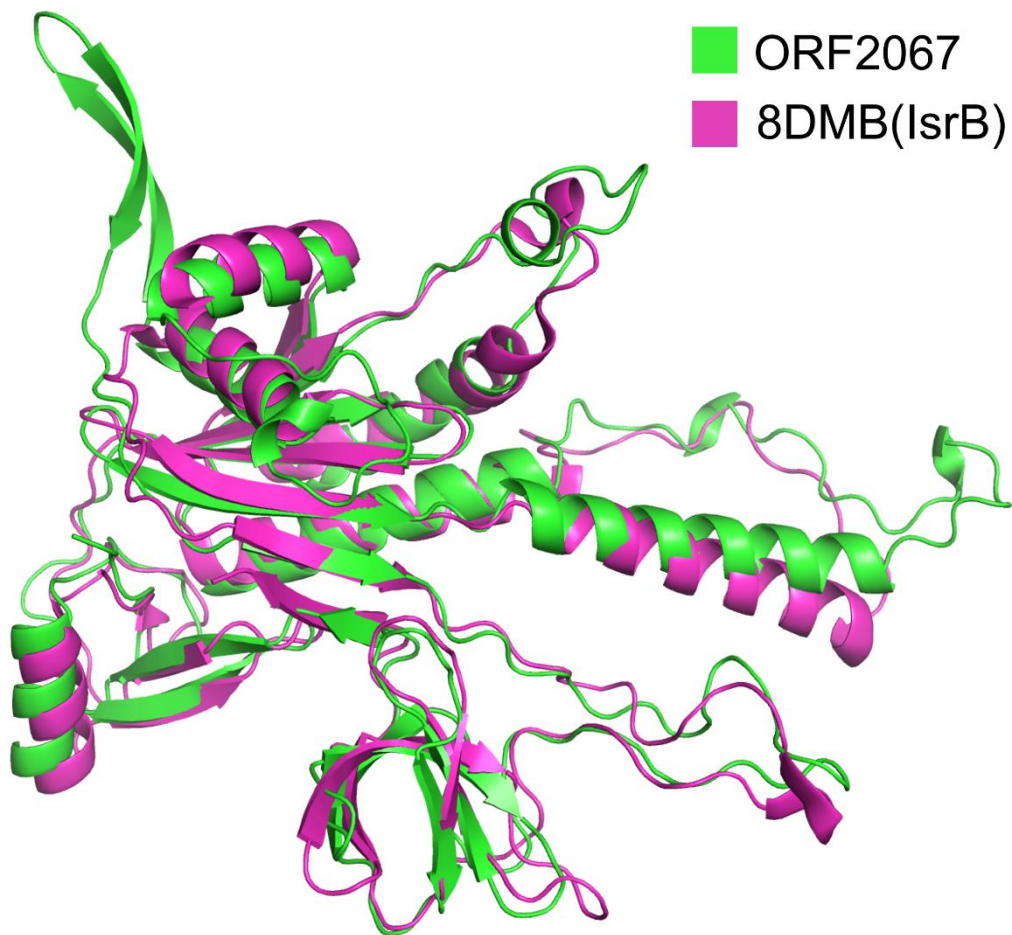

75

76 **FIG S6** Structural comparison of *Microcystis* ORF2067 (magenta, predicted by  
77 Alphafold2) against *Desulfovibrio thermocuniculi* IsrB (green, PDB: 8DMB).

78

79

80

81

82

83

84

85

86

87

88 **Supplementary tables**

89 **TABLE S2** Summary of the host response gene number after infection.

| <b>Time (h)</b>      | <b>0.5</b> | <b>1</b> | <b>1.5</b> | <b>2</b> | <b>4</b> | <b>6</b> | <b>8</b> | <b>10</b> |
|----------------------|------------|----------|------------|----------|----------|----------|----------|-----------|
| Up-regulated genes   | 109        | 113      | 163        | 241      | 410      | 560      | 588      | 583       |
| Down-regulated genes | 17         | 71       | 164        | 220      | 476      | 513      | 446      | 384       |

90

91

92

93

94

95

96

97

98

99

100

101

102

103

104

105

106 **TABLE S3** Transcriptional level of a polyketide synthase pathway in the *Microcystis* genome after Mic1 infection.

| Locus tag      | Strand | Annotation                                                                                          | Log <sub>2</sub> FoldChange |          |          |          |          |          |          |          |
|----------------|--------|-----------------------------------------------------------------------------------------------------|-----------------------------|----------|----------|----------|----------|----------|----------|----------|
|                |        |                                                                                                     | 0.5 h                       | 1 h      | 1.5 h    | 2 h      | 4 h      | 6 h      | 8 h      | 10 h     |
| <i>orf2639</i> | +      | Transcriptional regulator                                                                           | 2.4612084                   | /        | /        | /        | -1.63345 | -1.04477 | /        | 1.473188 |
| <i>orf2640</i> | -      | Hypothetical protein VL20_5146                                                                      | 6.4102847                   | 5.760095 | 4.118665 | 2.086657 | -2.36636 | -1.2546  | /        | 2.363854 |
| <i>orf2641</i> | +      | Polyketide synthase PksJ                                                                            | 5.5519478                   | 4.958536 | 2.315594 | /        | -2.53106 | -1.60033 | /        | 2.872712 |
| <i>orf2642</i> | +      | Hypothetical protein                                                                                | 5.8659139                   | 4.976635 | 2.669211 | /        | -2.19939 | -1.68823 | -1.72036 | 2.718858 |
| <i>orf2643</i> | +      | Phthiocerol/phenolphthiocerol<br>synthase type I PpsB                                               | 6.1315641                   | 5.076128 | 2.774814 | /        | -1.93521 | -1.42861 | -1.40167 | 2.546412 |
| <i>orf2644</i> | +      | Phenolphthiocerol synthesis polyketide synthase<br>type I Pks15/1                                   | 4.2143615                   | 4.194029 | 1.583222 | /        | -1.6985  | -1.36727 | -1.10605 | 2.13411  |
| <i>orf2645</i> | +      | Peptide synthetase                                                                                  | 4.9906953                   | 4.96781  | 3.370554 | /        | -1.32123 | /        | /        | 2.237928 |
| <i>orf2646</i> | -      | Multidrug resistance protein MdtC                                                                   | 4.4218152                   | 4.516152 | 3.026797 | /        | /        | 1.207171 | /        | 2.281126 |
| <i>orf2647</i> | -      | Solvent efflux pump periplasmic linker SrpA                                                         | 2.5826113                   | 2.702131 | 1.53083  | /        | /        | /        | /        | 1.953742 |
| <i>orf2648</i> | -      | VPDSG-CTERM motif (stress sensor)                                                                   | 5.8360923                   | 5.209478 | 4.066525 | 1.042213 | -1.83363 | -1.59634 | -1.65425 | 1.78915  |
| <i>orf2649</i> | -      | PEP-CTERM sorting domain-containing protein                                                         | 5.3130824                   | 5.166991 | 4.184787 | 2.426615 | /        | -1.07259 | /        | 1.910546 |
| <i>orf2650</i> | -      | VPDSG-CTERM motif                                                                                   | 5.0948386                   | 4.977906 | 4.05174  | 1.836686 | -1.93539 | -1.46646 | /        | 1.515961 |
| <i>orf2651</i> | -      | Dehydrogenase                                                                                       | 4.0568476                   | 4.604382 | 3.307606 | /        | -1.7753  | -1.26227 | -1.23494 | 2.398548 |
| <i>orf2652</i> | -      | Putative MFS-type transporter YcaD                                                                  | 2.8082371                   | 3.475419 | 2.418648 | /        | -1.10678 | -1.01994 | /        | 2.195439 |
| <i>orf2653</i> | -      | Polyketide biosynthesis protein PksE<br>3-hydroxyacyl-[acyl-carrier-protein] dehydratase            | 3.7209192                   | 4.277037 | 2.997778 | /        | -1.07291 | /        | /        | 2.102777 |
| <i>orf2654</i> | -      | FabA                                                                                                | 4.9043982                   | 4.83869  | 3.571569 | 1.689592 | -1.87002 | -1.4065  | -1.07553 | 2.139205 |
| <i>orf2655</i> | -      | Polyketide synthase PksN                                                                            | 5.2274829                   | 5.09874  | 3.641738 | /        | -1.46475 | -1.20346 | -1.13286 | 2.445249 |
| <i>orf2656</i> | -      | Polyketide synthase modules and related proteins<br>Phenolphthiocerol synthesis polyketide synthase | 4.4503857                   | 4.411876 | 3.054075 | /        | -1.77759 | /        | -1.16285 | 2.398233 |
| <i>orf2657</i> | -      | type I Pks15/1                                                                                      | 4.2318081                   | 4.171043 | 2.852323 | /        | -1.28183 | /        | /        | 2.402555 |

107

108



109 **TABLE S4** Transcriptional level of a type III-B CRISPR pathway in the *Microcystis* genome after Mic1 infection.

| Locus tag                       | Strand | Annotation                                      | Log <sub>2</sub> FoldChange |          |          |          |          |          |          |          |
|---------------------------------|--------|-------------------------------------------------|-----------------------------|----------|----------|----------|----------|----------|----------|----------|
|                                 |        |                                                 | 0.5 h                       | 1 h      | 1.5 h    | 2 h      | 4 h      | 6 h      | 8 h      | 10 h     |
| <i>orf1109</i>                  | -      | Cas_Csm6                                        | /                           | /        | /        | 1.30323  | /        | 3.301023 | 4.283178 | 4.280763 |
| <i>orf1110</i>                  | -      | Type III-B CRISPR module RAMP protein Cmr6      | /                           | /        | /        | /        | 1.372048 | 3.541163 | 4.530266 | 4.295065 |
| <i>orf1111</i>                  | -      | CRISPR-associated protein Cmr5                  | /                           | 1.197197 | /        | 1.474082 | 1.336261 | 3.615945 | 4.767138 | 4.59428  |
| <i>orf1112</i>                  | -      | Uma2 family endonuclease                        | /                           | /        | 1.114649 | 1.111276 | 1.416458 | 4.009954 | 5.256806 | 5.262678 |
| <i>orf1113</i>                  | -      | Type III-B CRISPR module RAMP protein Cmr4      | /                           | /        | /        | 1.290125 | 1.248191 | 4.106955 | 5.095018 | 5.106959 |
| note=CRISPR with 2 repeat units |        |                                                 |                             |          |          |          |          |          |          |          |
| <i>orf1114</i>                  | -      | CRISPR-associated protein Cmr3                  | /                           | /        | /        | 1.260325 | /        | 2.896936 | 3.923709 | 3.66849  |
| <i>orf1115</i>                  | -      | Type III-B CRISPR-associated protein Cas10/Cmr2 | 1.00252                     | /        | /        | /        | /        | /        | /        | /        |
| <i>orf1116</i>                  | -      | WYL domain-containing protein                   | /                           | /        | /        | /        | /        | /        | /        | 1.120162 |
| note=CRISPR with 7 repeat units |        |                                                 |                             |          |          |          |          |          |          |          |

110

111

112

113

114

115

116

117

118 **TABLE S5** KEGG enrichment analysis of the *Microcystis* downregulated protein-coding genes after Mic1 infection.

| Locus tag                     | Gene name           | Annotation                                       | Log <sub>2</sub> FoldChange |     |           |           |           |           |           |           |           |
|-------------------------------|---------------------|--------------------------------------------------|-----------------------------|-----|-----------|-----------|-----------|-----------|-----------|-----------|-----------|
|                               |                     |                                                  | 0.5 h                       | 1 h | 1.5 h     | 2 h       | 4 h       | 6 h       | 8 h       | 10 h      |           |
| <b>Photosynthesis pathway</b> |                     |                                                  |                             |     |           |           |           |           |           |           |           |
| <i>orf141</i>                 | <i>psbJ</i>         | Photosystem II reaction center protein J         | /                           | /   | /         | /         | /         |           | -1.201243 | -2.087642 | /         |
| <i>orf143</i>                 | <i>psbF</i>         | Cytochrome b559 subunit beta                     | /                           | /   | /         | /         |           | -1.250366 | -1.569605 | -1.40205  | -1.138037 |
| <i>orf144</i>                 | <i>psbE</i>         | Cytochrome b559 subunit alpha                    | /                           | /   | /         | /         |           | -1.315481 | -1.519895 | -1.573858 | -1.053689 |
| <i>orf330</i>                 | <i>psaB</i>         | Phosphorylase                                    | /                           | /   | /         | /         |           | -1.925144 | -1.81953  | -1.882642 | -1.388888 |
| <i>orf331</i>                 | <i>psaA</i>         | Photosystem I core protein PsaA                  | /                           | /   | /         | -1.304793 | -2.34749  | -2.317547 | -2.209604 | -1.733649 |           |
| <i>orf345</i>                 | <i>psaJ</i>         | Photosystem I subunit IX                         | /                           | /   | /         | -1.178315 | -2.190563 | -2.218158 | -2.258534 | -1.844846 |           |
| <i>orf346</i>                 | <i>psaF</i>         | Photosystem I reaction center subunit III        | /                           | /   | /         | -1.051194 | -2.072846 | -2.189871 | -2.094665 | -1.886535 |           |
| <i>orf377</i>                 | <i>psbO</i>         | Photosystem II manganese-stabilizing polypeptide | /                           | /   | /         | /         |           | -1.455193 | -1.420518 | -1.051832 | /         |
| <i>orf475</i>                 | <i>psaK</i>         | Photosystem I reaction center subunit PsaK       | /                           | /   | -1.285305 | -1.524465 | -2.133878 | -2.427376 | -2.219605 | -1.869541 |           |
| <i>orf489</i>                 | <i>cpcC</i>         | Photosystem I reaction center subunit XII        | /                           | /   | -1.095086 | -1.523684 | -2.399969 | -2.410539 | -2.342115 | -2.008888 |           |
| <i>orf490</i>                 | <i>cpcC</i>         | Photosystem I reaction center subunit XII        | /                           | /   | -1.053396 | -1.510809 | -2.284716 | -2.450062 | -2.345996 | -2.000975 |           |
| <i>orf491</i>                 | <i>cpcA</i>         | Phycocyanin subunit alpha                        | /                           | /   | -1.181315 | -1.607822 | -2.502661 | -2.42828  | -2.498428 | -2.078517 |           |
| <i>orf492</i>                 | <i>cpcB</i>         | Phycocyanin subunit beta                         | /                           | /   | -1.211637 | -1.646318 | -2.542182 | -2.339128 | -2.432239 | -2.101509 |           |
| <i>orf555</i>                 | <i>psbZ</i>         | Photosystem II reaction center protein Z         | /                           | /   | -1.281835 | -1.658332 | -2.050432 | -1.978609 | -1.783488 | -1.69584  |           |
| <i>orf569</i>                 | <i>psaK</i>         | Photosystem I reaction center subunit PsaK       | /                           | /   | /         | /         |           | -1.237088 | -1.185189 | -1.425413 | -1.107851 |
| <i>orf594</i>                 | <i>psaE</i>         | Photosystem I reaction center subunit IV         | /                           | /   | -1.100902 | -1.172105 | -2.274811 | -2.161566 | -1.658397 | -1.866168 |           |
| <i>orf661</i>                 | <i>psaI</i>         | Photosystem I reaction center subunit VIII       | /                           | /   | /         | -1.468384 | -2.554494 | -2.317852 | -2.001605 | -1.204219 |           |
| <i>orf662</i>                 | <i>psaL</i>         | Photosystem I reaction center protein subunit XI | /                           | /   | /         | -1.027162 | -2.382945 | -2.292118 | -2.039346 | -1.633021 |           |
| <i>orf760</i>                 | <i>pethH</i>        | Ferredoxin--NADP(+) reductase                    | /                           | /   | /         | /         |           | -1.69618  | -1.849362 | -1.650852 | -1.194849 |
| <i>orf1273</i>                | <i>apcE</i>         | Photosystem I reaction center subunit X          | /                           | /   | /         | -1.306494 | -2.126029 | -2.266192 | -2.000028 | -1.760948 |           |
| <i>orf1322</i>                | <i>apcD</i>         | Allophycocyanin subunit alpha                    | /                           | /   | /         | -1.133682 | -1.9737   | -1.902514 | -1.816066 | -1.760642 |           |
| <i>orf1402</i>                | <i>ATPF1B, atpD</i> | ATP synthase subunit beta                        | /                           | /   | /         | -1.259526 | -1.859781 | -2.045115 | -2.025824 | -1.671682 |           |
| <i>orf1403</i>                | <i>ATPF1E, atpC</i> | ATP synthase epsilon chain                       | /                           | /   | -1.019071 | -1.265868 | -1.879405 | -1.999593 | -1.650046 | -1.492712 |           |
| <i>orf1433</i>                | <i>cpcG</i>         | Phycobilisome rod-core linker polypeptide CpcG   | /                           | /   | -1.148142 | -1.613261 | -2.421204 | -2.210494 | -2.122146 | -1.828206 |           |

|                                             |                     |                                              |   |           |           |           |           |           |           |           |
|---------------------------------------------|---------------------|----------------------------------------------|---|-----------|-----------|-----------|-----------|-----------|-----------|-----------|
| <i>orf1599</i>                              | <i>psbV</i>         | Cytochrome c-550                             | / | /         | /         | -1.175374 | -2.19253  | -2.008311 | -1.762699 | -1.446373 |
| <i>orf1863</i>                              | <i>cpcE</i>         |                                              | / | -1.139688 | /         | /         | /         | /         | -1.106831 | /         |
| <i>orf2052</i>                              | <i>atpI</i>         | ATP synthase protein I                       | / | /         | /         | /         | -1.533646 | -1.74822  | -1.58791  | -1.195098 |
| <i>orf2053</i>                              | <i>ATPF0A, atpB</i> | AtpB                                         | / | /         | /         | /         | -1.496058 | -1.67446  | -1.660346 | -1.270855 |
| <i>orf2054</i>                              | <i>ATPF0C, atpE</i> | ATP synthase F0 subunit C                    | / | /         | /         | -1.03497  | -1.413663 | -1.793516 | -2.041615 | -1.421271 |
| <i>orf2055</i>                              | <i>ATPF0B, atpF</i> | F0F1 ATP synthase subunit B'                 | / | /         | -1.269863 | -1.508116 | -1.720013 | -1.840708 | -1.617089 | -1.458756 |
| <i>orf2056</i>                              | <i>ATPF0B, atpF</i> | ATP synthase subunit B                       | / | /         | -1.051844 | -1.370558 | -1.783724 | -1.76669  | -1.577814 | -1.391811 |
| <i>orf2057</i>                              | <i>ATPF1D, atpH</i> | F0F1 ATP synthase subunit delta              | / | /         | /         | -1.269876 | -1.615655 | -1.667103 | -1.594624 | -1.302267 |
| <i>orf2058</i>                              | <i>ATPF1A, atpA</i> | ATP synthase subunit alpha                   | / | /         | /         | -1.088211 | -1.50464  | -1.575348 | -1.511965 | -1.139905 |
| <i>orf2059</i>                              | <i>ATPF1G, atpG</i> | F0F1 ATP synthase subunit gamma              | / | /         | /         | -1.12453  | -1.616107 | -1.632777 | -1.367676 | -1.26374  |
| <i>orf2091</i>                              | <i>petF</i>         | Ferredoxin                                   | / | /         | /         | /         | /         | -1.019241 | -1.253178 | /         |
| <i>orf2121</i>                              | <i>petA</i>         | Apocytochrome f                              | / | /         | /         | /         | -1.275579 | -1.564538 | -1.404608 | /         |
| <i>orf2122</i>                              | <i>petC</i>         | Cytochrome b6-f complex iron-sulfur subunit  | / | /         | /         | /         | -1.462803 | -1.577591 | -1.370307 | /         |
| <i>orf2306</i>                              | <i>psaD</i>         | Photosystem I reaction center subunit II     | / | /         | -1.255751 | -1.586505 | -2.30004  | -2.302488 | -2.049052 | -1.709965 |
| <i>orf2316</i>                              | <i>psb27</i>        | Photosystem II protein Psb27                 | / | /         | /         | -1.072767 | -1.663375 | -1.951865 | -1.773887 | -1.405001 |
| <i>orf2448</i>                              | <i>psb28-2</i>      | Photosystem II reaction center protein Psb28 | / | /         | /         | -1.024929 | -1.577191 | -1.296547 | /         | -1.296862 |
| <i>orf2456</i>                              | <i>apcC</i>         | Phycobilisome core linker protein            | / | /         | /         | /         | /         | -1.380081 | -1.352839 | -1.021501 |
| <i>orf2457</i>                              | <i>apcB</i>         | Allophycocyanin subunit beta                 | / | -1.024325 | -1.208384 | -1.675588 | -2.316682 | -2.434112 | -2.461914 | -2.025557 |
| <i>orf2458</i>                              | <i>apcA</i>         | Allophycocyanin subunit alpha                | / | /         | -1.207004 | -1.684449 | -2.3219   | -2.454783 | -2.396376 | -2.061688 |
| <i>orf2517</i>                              | <i>psbH</i>         | Photosystem II reaction center protein H     | / | /         | /         | /         | -1.180627 | -1.141909 | /         | /         |
| <i>orf2537</i>                              | <i>psb28</i>        | Photosystem II reaction center protein Psb28 | / | /         | /         | /         | -1.111062 | -1.03049  | /         | /         |
| <i>orf2689</i>                              | <i>apcF</i>         | Phycobiliprotein beta chain                  | / | /         | /         | -1.070592 | -1.957198 | -2.001398 | -1.943838 | -1.732666 |
| <i>orf2950</i>                              | <i>petF</i>         | Ferredoxin                                   | / | /         | /         | /         | -1.116738 | /         | /         | /         |
| <i>orf3286</i>                              | <i>psbU</i>         | Photosystem II extrinsic protein             | / | /         | /         | /         | -1.487493 | -1.471319 | -1.328205 | -1.047037 |
| <i>orf3379</i>                              | <i>psaC</i>         | Photosystem I subunit VII                    | / | /         | /         | -1.006419 | -2.123557 | -1.898789 | -2.059773 | -1.751667 |
| <i>orf3634</i>                              | <i>psbX</i>         | Photosystem II PsbX protein                  | / | /         | /         | /         | -1.442145 | -1.276505 | -1.001694 | -1.217276 |
| <b>Porphyrin and chlorophyll Metabolism</b> |                     |                                              |   |           |           |           |           |           |           |           |
| <i>orf221</i>                               | <i>chlH, bchH</i>   | Magnesium chelatase subunit H                | / | /         | /         | -1.160131 | -1.911091 | -2.130854 | -1.795053 | -1.619046 |
| <i>orf304</i>                               | <i>hemE, UROD</i>   | Uroporphyrinogen decarboxylase               | / | /         | /         | /         | -1.947086 | -1.936584 | -1.427503 | -1.431571 |

|                                |                    |              |                                                                                          |           |   |           |           |           |           |           |           |
|--------------------------------|--------------------|--------------|------------------------------------------------------------------------------------------|-----------|---|-----------|-----------|-----------|-----------|-----------|-----------|
| <i>orf962</i>                  | <i>HO, hmuO</i>    | <i>pbsA1</i> | Heme oxygenase (biliverdin-producing)                                                    | /         | / | /         | -1.308417 | -2.2459   | -2.324744 | -2.089241 | -2.103153 |
| <i>orf1136</i>                 | <i>acsF, chlE</i>  |              | Magnesium-protoporphyrin IX monomethyl ester (oxidative) cyclase                         | /         | / | /         | /         | -1.730521 | -1.624501 | -1.293144 | -2.320904 |
| <i>orf1528</i>                 | <i>chlL</i>        |              | Ferredoxin:protochlorophyllide reductase (ATP-dependent) iron-sulfur ATP-binding protein | /         | / | -1.021894 | -1.326652 | -2.117079 | -2.412089 | -1.90514  | -1.802095 |
| <i>orf1530</i>                 | <i>chlN</i>        |              | Ferredoxin:protochlorophyllide reductase (ATP-dependent) subunit N                       | /         | / | /         | /         | -1.875984 | -2.310835 | -1.525526 | -1.542646 |
| <i>orf1769</i>                 | <i>hemA</i>        |              | Glutamyl-tRNA reductase                                                                  | /         | / | /         | -1.167893 | -1.889357 | -1.628732 | -1.535361 | -1.157239 |
| <i>orf1801</i>                 | <i>cobH-cbiC</i>   |              | Precorrin-8X methylmutase                                                                | -1.102074 | / | /         | /         | /         | /         | /         | /         |
| <i>orf1802</i>                 | <i>cobI-cbiL</i>   |              | Precorrin-2 C(20)-methyltransferase                                                      | -1.243997 | / | /         | /         | /         | /         | /         | /         |
| <i>orf1998</i>                 | <i>acsF, chlE</i>  |              | Magnesium-protoporphyrin IX monomethyl ester (oxidative) cyclase 1                       | /         | / | /         | -1.312134 | -2.425128 | -2.42925  | -1.916258 | -1.662659 |
| <i>orf2087</i>                 | <i>hemC, HMBS</i>  |              | Hydroxymethylbilane synthase                                                             | /         | / | /         | /         | -1.020639 | -1.3712   | -1.245735 | -1.083423 |
| <i>orf2157</i>                 | <i>chlP, bchP</i>  |              | Geranylgeranyl reductase                                                                 | /         | / | /         | /         | -2.19933  | -2.420374 | -2.076469 | -1.749383 |
| <i>orf2339</i>                 | <i>COX10, cyoE</i> | <i>ctaB</i>  | Protoheme IX farnesyltransferase                                                         | /         | / | /         | /         | /         | /         | /         | -1.123575 |
| <i>orf2340</i>                 | <i>COX15, ctaA</i> |              | Heme A synthase                                                                          | /         | / | /         | /         | -1.163557 | /         | -1.003792 | -1.367286 |
| <i>orf2571</i>                 | <i>chlB</i>        |              | Ferredoxin:protochlorophyllide reductase (ATP-dependent) subunit B                       | /         | / | /         | /         | -2.143678 | -2.441956 | -1.973517 | -1.794203 |
| <i>orf2593</i>                 | <i>cobB-cbiA</i>   |              | Cobyrinic acid a,c-diamide synthase                                                      | /         | / | /         | /         | -1.159765 | /         | /         | /         |
| <i>orf2613</i>                 | <i>bciB</i>        |              | Hypothetical protein                                                                     | /         | / | /         | /         | -1.68647  | -1.68953  | -1.269966 | -1.154242 |
| <i>orf3679</i>                 | <i>BLVRA, bvdR</i> |              | Gfo/Idh/MocA family oxidoreductase                                                       | /         | / | /         | /         | /         | -1.07051  | -1.173084 | -1.254367 |
| <i>orf3768</i>                 | <i>pcyA</i>        |              | Phycocyanobilin:ferredoxin oxidoreductase                                                | /         | / | /         | /         | /         | -1.041524 | -1.030239 | /         |
| <i>orf3782</i>                 | <i>CPOX, hemF</i>  |              | Coproporphyrinogen III oxidase                                                           | /         | / | /         | -1.176253 | -1.753001 | -1.967197 | -1.883035 | -1.767562 |
| <i>orf3918</i>                 | <i>hemB, ALAD</i>  |              | Delta-aminolevulinic acid dehydratase                                                    | /         | / | /         | /         | -1.494445 | -1.450056 | -1.408465 | -1.520044 |
| <i>orf4253</i>                 | <i>EARS, gltX</i>  |              | Glutamate--tRNA ligase                                                                   | /         | / | /         | /         | -1.292691 | -1.709524 | -1.284351 | -1.200924 |
| <b>Carbohydrate Metabolism</b> |                    |              |                                                                                          |           |   |           |           |           |           |           |           |
| <i>orf023</i>                  | <i>ISA, treX</i>   |              | Glycogen debranching enzyme                                                              | /         | / | /         | /         | /         | /         | -1.201634 | -1.072206 |
| <i>orf149</i>                  | <i>GAPDH, gapA</i> |              | Type I glyceraldehyde-3-phosphate dehydrogenase                                          | /         | / | /         | -1.060369 | -1.124256 | /         | /         | /         |
| <i>orf291</i>                  | <i>PRK, prkB</i>   |              | Phosphoribulokinase                                                                      | /         | / | /         | /         | /         | -1.098592 | /         | /         |
| <i>orf664</i>                  | <i>PGK, pgk</i>    |              | Phosphoglycerate kinase                                                                  | /         | / | /         | -1.1844   | -1.753299 | -1.988866 | -1.984338 | -1.611036 |

|                              |                       |                                                       |   |           |           |           |           |           |           |           |
|------------------------------|-----------------------|-------------------------------------------------------|---|-----------|-----------|-----------|-----------|-----------|-----------|-----------|
| <i>orf959</i>                | <i>tktA, tktB</i>     | Transketolase                                         | / | /         | /         | /         | -1.39782  | -1.126337 | /         | /         |
| <i>orf1011</i>               | <i>gmd, GMDS</i>      | GDP-mannose 4,6-dehydratase                           | / | /         | -1.072568 | -1.145948 | -1.006162 | /         | /         | /         |
| <i>orf1085</i>               | <i>gap2</i>           | Glyceraldehyde-3-phosphate dehydrogenase 2            | / | /         | -1.170231 | -1.431752 | -2.190859 | -2.241147 | -2.038929 | -1.776055 |
| <i>orf1156</i>               | <i>nanE</i>           | N-acetylmannosamine-6-phosphate 2-epimerase           | / | -1.284792 | -1.297003 | -1.54504  | -1.389105 | -1.462729 | -1.028215 | /         |
| <i>orf1212</i>               | <i>PDHB, pdhB</i>     | Alpha-ketoacid dehydrogenase subunit beta             | / | /         | /         | -1.00962  | -1.590848 | -1.448146 | -1.110622 | /         |
| <i>orf1326</i>               | <i>glgA</i>           | Starch synthase                                       | / | /         | -1.172735 | -1.257534 | -1.780259 | -2.161627 | -2.058277 | -1.499022 |
| <i>orf1421</i>               | <i>DLD, lpd, pdhD</i> | Dihydrolipoyl dehydrogenase                           | / | /         | /         | /         | /         | /         | -1.042142 | /         |
| <i>orf1443</i>               | <i>treZ, glgZ</i>     | Malto-oligosyltrehalose trehalohydrolase              | / | /         | /         | /         | -1.541588 | -1.445924 | -1.05268  | -1.063685 |
| <i>orf1485</i>               | <i>K16149</i>         | Glycoside hydrolase                                   | / | /         | /         | /         | -1.286263 | -1.651033 | -1.702122 | -1.269093 |
| <i>orf1770</i>               | <i>glpX-SEBP</i>      | Fructose-bisphosphatase class II                      | / | /         | -1.254271 | -1.578668 | -2.147261 | -2.208697 | -2.169432 | -1.730002 |
| <i>orf1864</i>               | <i>PK, pyk</i>        | Pyruvate kinase                                       | / | -1.089382 | /         | /         | -1.056363 | /         | /         | /         |
| <i>orf1870</i>               | <i>glgC</i>           | Glucose-1-phosphate adenylyltransferase               | / | /         | -1.24163  | -1.436757 | -2.004339 | -2.141168 | -1.834495 | -1.662528 |
| <i>orf2128</i>               | <i>UXS1, uxs</i>      | NAD-dependent epimerase/dehydratase family protein    | / | /         | -1.044495 | -1.050978 | -1.351149 | -1.68754  | -1.511221 | -1.149849 |
| <i>orf2319</i>               | <i>pgm</i>            | Alpha-D-glucose phosphate-specific phosphoglucomutase | / | /         | /         | /         | /         | /         | -1.078875 | /         |
| <i>orf2329</i>               | <i>glgA</i>           | Starch synthase                                       | / | /         | /         | /         | -1.068973 | -1.228965 | -1.238921 | /         |
| <i>orf2519</i>               | <i>GBE1, glgB</i>     | 1,4-alpha-glucan branching enzyme                     | / | /         | /         | /         | /         | -1.091795 | -1.198979 | /         |
| <i>orf2595</i>               | <i>pckA</i>           | Phosphoenolpyruvate carboxykinase (ATP)               | / | /         | /         | /         | -1.690188 | -1.694098 | -1.327352 | -1.473663 |
| <i>orf3143</i>               | <i>rpe, RPE</i>       | Ribulose-phosphate 3-epimerase                        | / | /         | /         | -1.070903 | -1.664308 | -1.837612 | -1.81189  | -1.481863 |
| <i>orf4218</i>               | <i>rfbE</i>           | CDP-paratose 2-epimerase                              | / | /         | -1.178217 | -1.037836 | -1.344658 | /         | /         | /         |
| <i>orf4219</i>               | <i>rfbS</i>           | NAD(P)-dependent oxidoreductase                       | / | /         | -1.24379  | /         | -1.895303 | /         | /         | /         |
| <i>orf4439</i>               | <i>FBA, fbaA</i>      | Fructose-1,6-bisphosphate aldolase                    | / | /         | /         | /         | /         | -1.049788 | -1.148942 | /         |
| <b>Amino acid Metabolism</b> |                       |                                                       |   |           |           |           |           |           |           |           |
| <i>orf2583</i>               | <i>psp</i>            | Histidine phosphatase family protein                  | / | -1.334204 | -1.297605 | -1.574947 | -1.842474 | -1.889604 | -1.713603 | -1.439689 |
| <i>orf2776</i>               | <i>serA, PHGDH</i>    | Phosphoglycerate dehydrogenase                        | / | -1.376746 | -1.314191 | -1.519293 | -1.410412 | /         | /         | /         |
| <i>orf4389</i>               | <i>trpA</i>           | Tryptophan synthase subunit alpha                     | / | -1.044023 | -1.127266 | -1.464781 | -1.401029 | -1.376036 | /         | /         |
| <b>Lipid Metabolism</b>      |                       |                                                       |   |           |           |           |           |           |           |           |
| <i>orf260</i>                | <i>accC</i>           | Acetyl-CoA carboxylase biotin carboxylase subunit     | / | -1.053166 | -1.170331 | -1.472398 | -1.435671 | -1.186436 | /         | /         |
| <i>orf960</i>                | <i>fabI</i>           | 3-oxoacyl-[acyl-carrier-protein] synthase 2           | / | /         | /         | /         | /         | -1.244559 | -1.270107 | /         |

|                                  |                     |                                                                                                      |   |   |           |           |           |           |           |           |
|----------------------------------|---------------------|------------------------------------------------------------------------------------------------------|---|---|-----------|-----------|-----------|-----------|-----------|-----------|
| <i>orf961</i>                    | <i>acpP</i>         | Acyl carrier protein                                                                                 | / | / | /         | /         | -1.134346 | -1.445378 | -1.120403 | -1.00068  |
| <i>orf1757</i>                   | <i>E1.14.19.3</i>   | Acyl-CoA desaturase                                                                                  | / |   | -1.000802 | -1.032509 | -1.412987 | /         | /         | /         |
| <i>orf2241</i>                   | <i>accB, bccP</i>   | Acetyl-CoA carboxylase biotin carboxyl carrier protein subunit                                       | / |   | -1.22623  | -1.160208 | -1.553536 | -1.402846 | -1.462059 | -1.445981 |
| <i>orf2654</i>                   | <i>fabA</i>         | 3-hydroxyacyl-[acyl-carrier protein] dehydratase / trans-2-decenoyl-[acyl-carrier protein] isomerase | / | / | /         | /         | -1.870018 | -1.406499 | -1.075531 | /         |
| <i>orf2657</i>                   | <i>fabD</i>         | Polyketide synthase                                                                                  | / | / | /         | /         | -1.281834 | /         | /         | /         |
| <i>orf2735</i>                   | <i>fabI</i>         | Enoyl-[acyl-carrier protein] reductase I                                                             | / | / | /         | /         | -1.299971 | -1.286843 | -1.219711 | /         |
| <i>orf2818</i>                   | <i>fabZ</i>         | Beta-hydroxyacyl-ACP dehydratase                                                                     | / |   | -1.011676 | -1.223857 | -1.290788 | -1.21654  | -1.243417 | -1.023701 |
| <i>orf3348</i>                   | <i>fadD</i>         | Long-chain acyl-CoA synthetase                                                                       | / | / | /         | /         | /         | -1.02831  | -1.247851 | -1.116828 |
| <i>orf3378</i>                   | <i>ACSS, acs</i>    | Acetyl-coenzyme A synthetase                                                                         | / |   | -1.027548 | -1.166988 | -1.178968 | -1.388212 | -1.396544 | -1.451172 |
| <b>Carbon fixation</b>           |                     |                                                                                                      |   |   |           |           |           |           |           |           |
| <i>orf3712</i>                   | <i>ccmK</i>         | Microcompartments protein                                                                            | / | / |           | -1.084617 | -1.544011 | -2.013013 | -2.332908 | -1.993407 |
| <i>orf3713</i>                   | <i>ccmK</i>         | Carbon dioxide-concentrating mechanism protein CcmK                                                  | / | / | /         | /         |           | -1.531553 | -1.598937 | -1.74274  |
| <i>orf3714</i>                   | <i>ccmL</i>         | Carbon dioxide concentrating mechanism protein CcmL                                                  | / | / |           | -1.321839 | -1.722478 | -2.074549 | -2.318592 | -1.875113 |
| <i>orf3715</i>                   | <i>ccmM</i>         | Carbon dioxide concentrating mechanism protein CcmM                                                  | / | / |           | -1.146145 | -1.547201 | -2.015334 | -2.072119 | -1.934726 |
| <i>orf3716</i>                   | <i>ccmN</i>         | Carbon dioxide concentrating mechanism protein                                                       | / |   | -1.014512 | -1.299227 | -1.659696 | -2.017927 | -2.022599 | -1.706354 |
| <i>orf3717</i>                   | <i>rbcL</i>         | Ribulose-bisphosphate carboxylase large subunit                                                      | / | / |           | -1.072348 | -1.386194 | -2.227396 | -2.262108 | -1.991006 |
| <i>orf3719</i>                   | <i>rbcS</i>         | Ribulose bisphosphate carboxylase small subunit                                                      | / | / |           | -1.274913 | -1.460708 | -2.125579 | -2.269645 | -1.779566 |
| <b>Oxidative phosphorylation</b> |                     |                                                                                                      |   |   |           |           |           |           |           |           |
| <i>orf945</i>                    | <i>ndhD</i>         | NAD(P)H-quinone oxidoreductase subunit D4                                                            | / | / | /         | /         |           | -1.573704 | -1.778697 | -1.564252 |
| <i>orf947</i>                    | <i>ndhF</i>         | NAD(P)H-quinone oxidoreductase subunit F                                                             | / | / | /         | /         |           | -1.349375 | -1.416703 | -1.564401 |
| <i>orf1155</i>                   | <i>ppa</i>          | Inorganic pyrophosphatase                                                                            | / | / | /         | /         | -1.40926  | -1.678185 | -1.708454 | -1.733365 |
| <i>orf1234</i>                   | <i>ndhA</i>         | NADH-quinone oxidoreductase subunit H                                                                | / | / | /         | /         |           | -1.073315 | -1.133462 | -1.296859 |
| <i>orf1235</i>                   | <i>ndhI</i>         | NAD(P)H-quinone oxidoreductase subunit I                                                             | / | / | /         | /         |           | -1.199853 | -1.0175   | /         |
| <i>orf1236</i>                   | <i>ndhG</i>         | NADH:ubiquinone oxidoreductase subunit J                                                             | / | / | /         | /         |           | -1.08541  | /         | /         |
| <i>orf1402</i>                   | <i>ATPF1B, atpD</i> | ATP synthase subunit beta                                                                            | / | / | /         | /         |           | -1.259526 | -1.859781 | -2.045115 |
| <i>orf1403</i>                   | <i>ATPF1E, atpC</i> | ATP synthase epsilon chain                                                                           | / | / |           | -1.019071 | -1.265868 | -1.879405 | -1.999593 | -1.650046 |

|                |                          |                                                       |   |   |           |           |           |           |           |           |
|----------------|--------------------------|-------------------------------------------------------|---|---|-----------|-----------|-----------|-----------|-----------|-----------|
| <i>orf1818</i> | <i>ndhM</i>              | NAD(P)H-quinone oxidoreductase subunit M              | / | / | -1.136791 | -1.122891 | -1.956112 | -1.416938 | /         | -1.185531 |
| <i>orf2053</i> | <i>ATPFOA, atpB</i>      | AtpB                                                  | / | / | /         | /         | -1.496058 | -1.67446  | -1.660346 | -1.270855 |
| <i>orf2054</i> | <i>ATPFOC, atpE</i>      | ATP synthase F0 subunit C                             | / | / | /         | -1.03497  | -1.413663 | -1.793516 | -2.041615 | -1.421271 |
| <i>orf2055</i> | <i>ATPFOB, atpF</i>      | F0F1 ATP synthase subunit B'                          | / | / | -1.269863 | -1.508116 | -1.720013 | -1.840708 | -1.617089 | -1.458756 |
| <i>orf2056</i> | <i>ATPFOB, atpF</i>      | ATP synthase subunit B                                | / | / | -1.051844 | -1.370558 | -1.783724 | -1.76669  | -1.577814 | -1.391811 |
| <i>orf2057</i> | <i>ATPF1D, atpH</i>      | F0F1 ATP synthase subunit delta                       | / | / | /         | -1.269876 | -1.615655 | -1.667103 | -1.594624 | -1.302267 |
| <i>orf2058</i> | <i>ATPF1A, atpA</i>      | ATP synthase subunit alpha                            | / | / | /         | -1.088211 | -1.50464  | -1.575348 | -1.511965 | -1.139905 |
| <i>orf2059</i> | <i>ATPF1G, atpG</i>      | F0F1 ATP synthase subunit gamma                       | / | / | /         | -1.12453  | -1.616107 | -1.632777 | -1.367676 | -1.26374  |
| <i>orf2249</i> | <i>ndhF</i>              | NAD(P)H-quinone oxidoreductase subunit F              | / | / | /         | /         | /         | -1.401208 | -1.301029 | -1.320056 |
| <i>orf2339</i> | <i>COX10, ctaB, cyoE</i> | Protoheme IX farnesyltransferase                      | / | / | /         | /         | /         | /         | /         | -1.123575 |
| <i>orf2340</i> | <i>COX15, ctaA</i>       | Heme A synthase                                       | / | / | /         | /         | -1.163557 | /         | -1.003792 | -1.367286 |
| <i>orf2341</i> | <i>coxB, ctaC</i>        | Cytochrome C oxidase subunit II                       | / | / | /         | /         | -1.485754 | -1.686257 | -1.465255 | -1.202403 |
| <i>orf2342</i> | <i>coxA, ctaD</i>        | Cytochrome c oxidase subunit I                        | / | / | /         | /         | -1.49678  | -1.698612 | -1.479239 | -1.185729 |
| <i>orf2343</i> | <i>coxC, ctaE</i>        | Heme-copper oxidase subunit III                       | / | / | /         | /         | -1.399835 | -1.50053  | -1.269476 | -1.03879  |
| <i>orf2351</i> | <i>sdhC, frdC</i>        | Putative succinate dehydrogenase cytochrome b subunit | / | / | /         | /         | -1.020112 | -1.152493 | -1.202111 | -1.055951 |
| <i>orf3477</i> | <i>ndhD</i>              | NAD(P)H-quinone oxidoreductase subunit D4             | / | / | /         | -1.156445 | -2.079242 | -2.204658 | -2.075789 | -1.788747 |
| <i>orf4060</i> | <i>ndhB</i>              | NAD(P)H-quinone oxidoreductase subunit 2              | / | / | /         | /         | -1.06573  | -1.440463 | -1.560607 | -1.24706  |
| <i>orf4254</i> | <i>ndhN</i>              | NAD(P)H-quinone oxidoreductase subunit N              | / | / | /         | /         | -1.468605 | -1.621216 | -1.78127  | -1.155769 |

119

120

121

122

123

124 **TABLE S6** Transcriptional levels of copy number variation genes in the *Microcystis* genome after Mic1 infection.

| Locus tag      | Length (bp) | Overlap (bp) | Strand | Annotation                                           | Log <sub>2</sub> FoldChange |           |           |           |          |          |          |           |
|----------------|-------------|--------------|--------|------------------------------------------------------|-----------------------------|-----------|-----------|-----------|----------|----------|----------|-----------|
|                |             |              |        |                                                      | 0.5 h                       | 1 h       | 1.5 h     | 2 h       | 4 h      | 6 h      | 8 h      | 10 h      |
| <i>orf3029</i> | 482         | 46           | -      | Hypothetical protein                                 | /                           | -1.318264 | -1.332001 | -1.500621 | -1.50249 | -1.42433 | -1.11091 | -1.244936 |
| <i>orf3030</i> | 1286        | 1287         | -      | DEDD_Tnp_IS110; Transposase                          | /                           | /         | /         | /         | /        | 3.502497 | 3.619751 | 3.833235  |
| <i>orf3031</i> | 380         | 279          | -      | Hypothetical protein                                 | /                           | /         | /         | 1.303704  | /        | /        | /        | /         |
| <i>orf3032</i> | 260         | 261          | -      | Hypothetical protein                                 | /                           | /         | /         | /         | /        | /        | /        | /         |
| <i>orf3033</i> | 314         | 315          | -      | Hypothetical protein                                 | /                           | /         | /         | 1.498289  | /        | /        | /        | /         |
| <i>orf3034</i> | 1052        | 1053         | -      | Lambda repressor-like; SpoIIID                       | /                           | /         | /         | /         | /        | /        | /        | /         |
| <i>orf3035</i> | 248         | 249          | +      | Lambda repressor-like; HTH_3_3                       | /                           | /         | /         | /         | /        | 1.288747 | 1.200416 | /         |
| <i>orf3036</i> | 932         | 933          | +      | Lipid binding protein                                | /                           | /         | /         | /         | 1.022143 | /        | /        | /         |
| <i>orf3037</i> | 236         | 237          | +      | Hypothetical protein                                 | /                           | /         | /         | /         | /        | /        | /        | /         |
| <i>orf3038</i> | 569         | 570          | -      | Phage integrase                                      | /                           | /         | /         | /         | /        | /        | /        | /         |
| <i>orf3039</i> | 1193        | 1194         | +      | Enolase                                              | /                           | /         | /         | /         | /        | /        | /        | /         |
| <i>orf3040</i> | 2003        | 2004         | +      | Hypothetical protein                                 | /                           | /         | /         | /         | /        | /        | /        | /         |
| <i>orf3041</i> | 812         | 813          | +      | Hypothetical protein                                 | /                           | /         | /         | /         | /        | 4.186136 | 4.419668 | 4.359621  |
| <i>orf3042</i> | 371         | 372          | +      | Hypothetical protein                                 | /                           | /         | /         | /         | /        | /        | /        | /         |
| <i>orf3043</i> | 386         | 387          | +      | Hypothetical protein                                 | /                           | /         | /         | /         | /        | 4.409537 | 3.645612 | 3.962079  |
| <i>orf3044</i> | 401         | 402          | +      | Hypothetical protein                                 | /                           | /         | /         | /         | /        | 4.465152 | 4.391242 | 4.253675  |
| <i>orf3045</i> | 467         | 468          | +      | Hypothetical protein                                 | /                           | /         | /         | /         | /        | 4.172835 | 4.591515 | 5.614151  |
| <i>orf3046</i> | 617         | 618          | +      | N-terminal Ig-like domain in baseplate protein       | /                           | /         | /         | /         | /        | 4.101424 | 3.172164 | 5.606252  |
| <i>orf3047</i> | 434         | 435          | +      | Hypothetical protein                                 | /                           | /         | /         | /         | /        | 3.212233 | /        | 2.037753  |
| <i>orf3048</i> | 800         | 801          | +      | LamG-like jellyroll fold domain-containing protein   | /                           | /         | /         | /         | /        | 2.975675 | 3.864765 | 3.607104  |
| <i>orf3049</i> | 230         | 231          | +      | Hypothetical protein                                 | /                           | /         | /         | /         | /        | /        | 3.068401 | 3.182221  |
| <i>orf3050</i> | 440         | 441          | +      | D-Ala-D-Ala carboxypeptidase family metallohydrolase | /                           | /         | /         | /         | 1.074036 | 1.042993 | /        | 1.327406  |
| <i>orf3051</i> | 248         | 57           | -      | Acetyltransferase (GNAT) domain                      | /                           | /         | /         | /         | /        | /        | /        | /         |

125
